# Supplementary material for: Muscle function decline and mitochondria changes in middle age precede sarcopenia in mice
Source: publisher site journal article supplement (doi:10.18632/aging.101358), 2018-01-04
Supplement: Supplementary file [file aging-v10i1-101358-supplementary-material-SD1.pdf]

## SUPPLEMENTARY MATERIAL

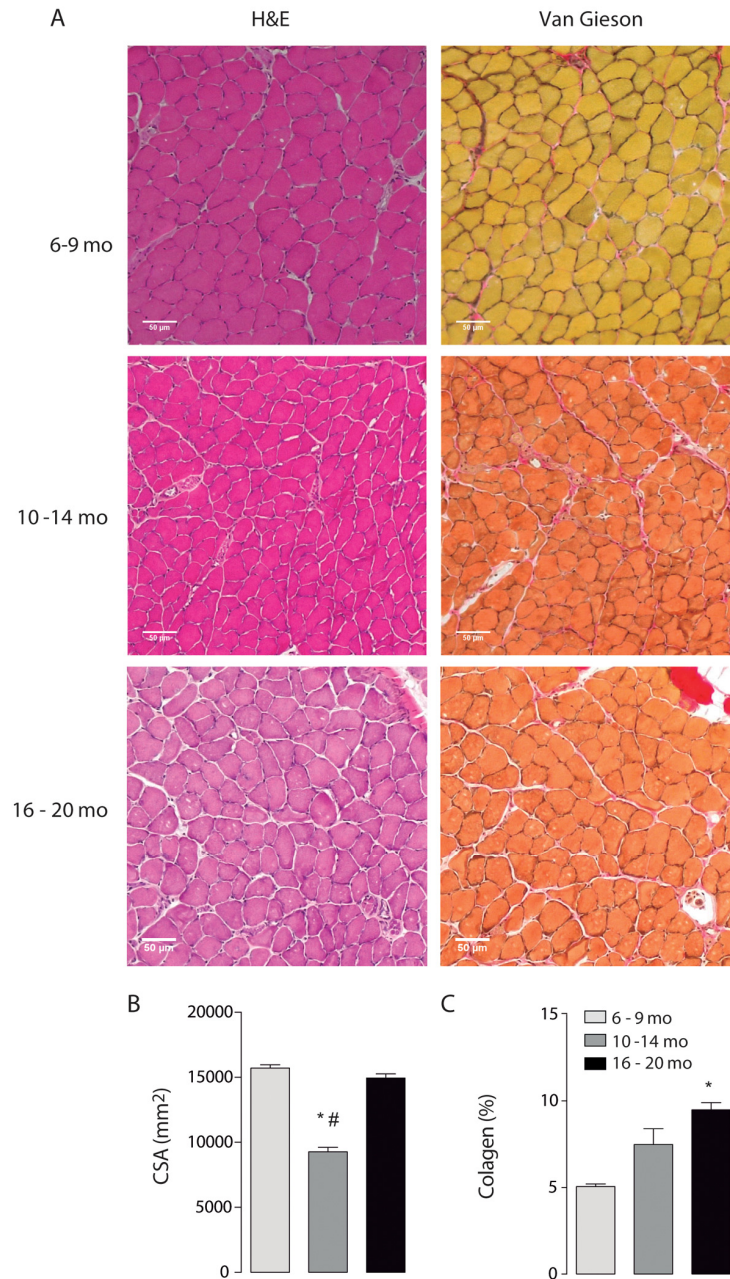

**Supplementary Figure 1. Changes in cross sections of skeletal muscle appear in midlife mice.** (A) Representative images of cross sections of Gastrocnemius/soleus complex in the different groups of mice (B) Cross-sectional area determined by Hematoxylin/eosin in the Gastrocnemius/soleus complex is significantly decreased in 10-14 mo group. (C) Collagen was determined by Van Gieson and is significantly increased in 16-20 mo group.

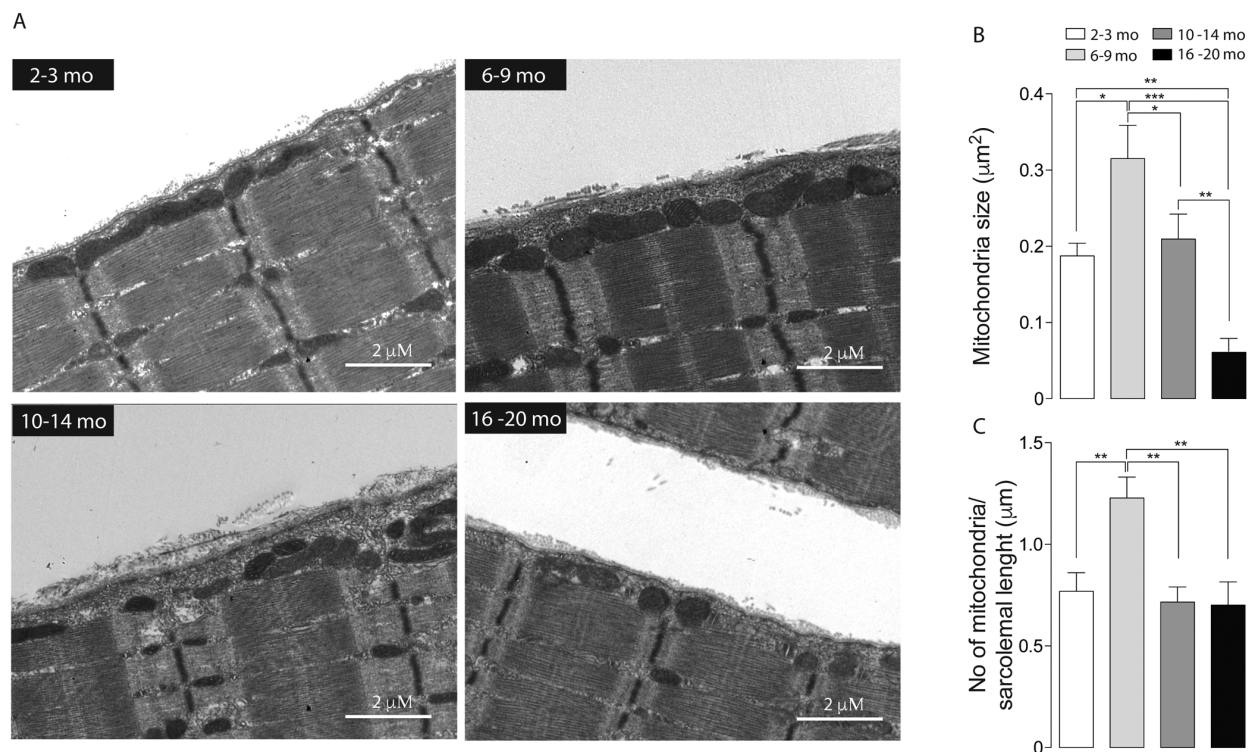

**Supplementary Figure 2. Decreased subsarcolemmal mitochondrial size in aged mice.** Each bar represents the mean  $\pm$  SD. \* $p < 0.05$ . \*\* $p < 0.01$  \*\*\* $p < 0.001$  (A) Representative images of electron microscopy from FDB longitudinal slices from mice from the different groups (B) Mitochondria size is significantly diminished in older groups. (C) Number of mitochondria per sarcolemma length is significantly increased in the adult group.

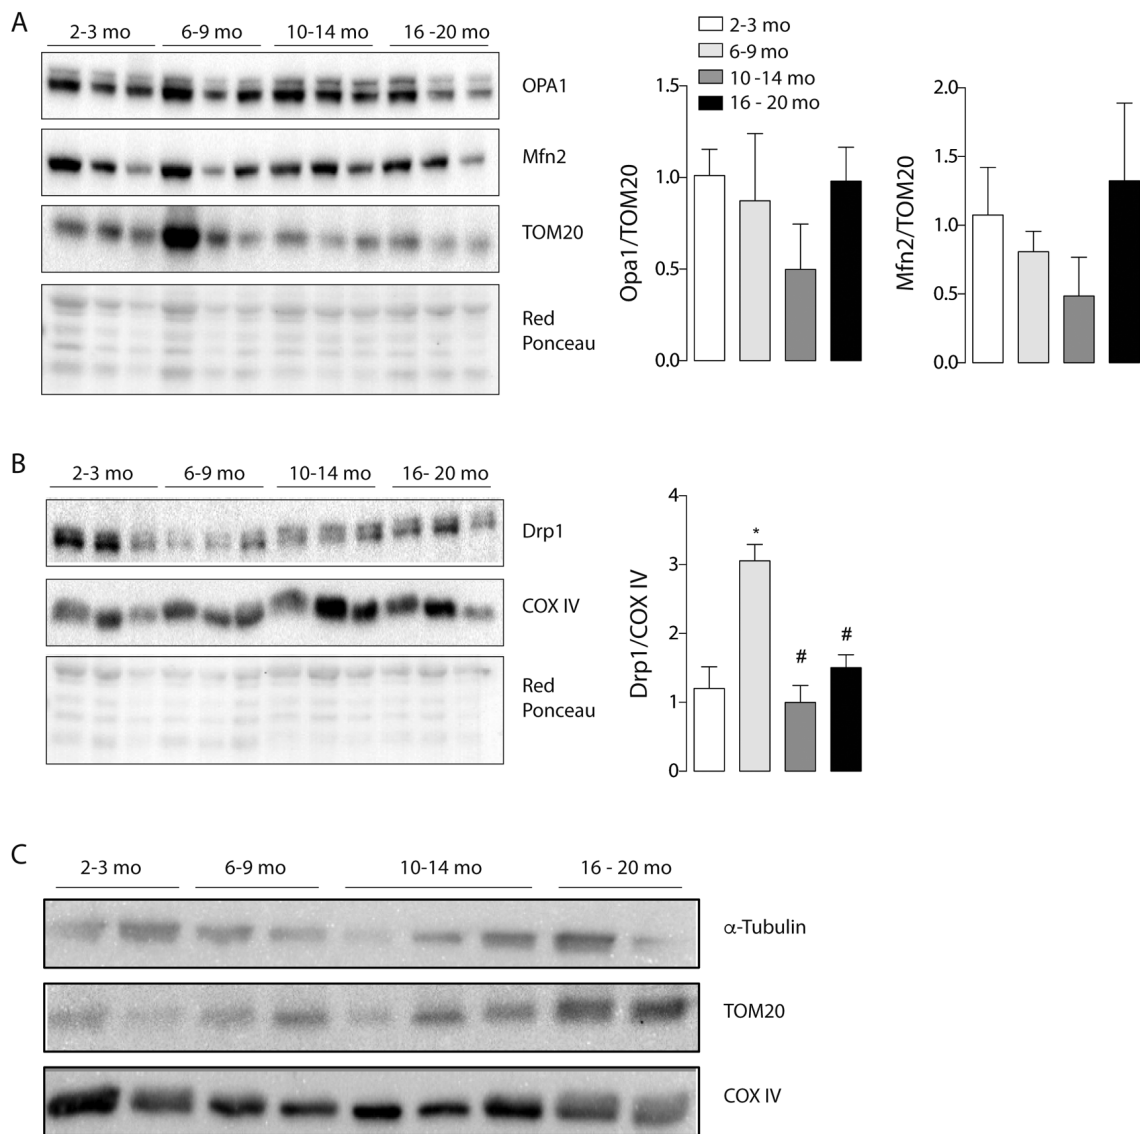

**Supplementary Figure 3. Mitochondrial proteins levels are not significantly different in aged mice. (A - B)** Western Blot for mitochondrial proteins in FDB muscle of mice in different groups of age do not vary significantly when normalized by non-related mitochondrial dynamics proteins. **(C)** Western Blot for TOM20 and COX IV in Soleus muscle.

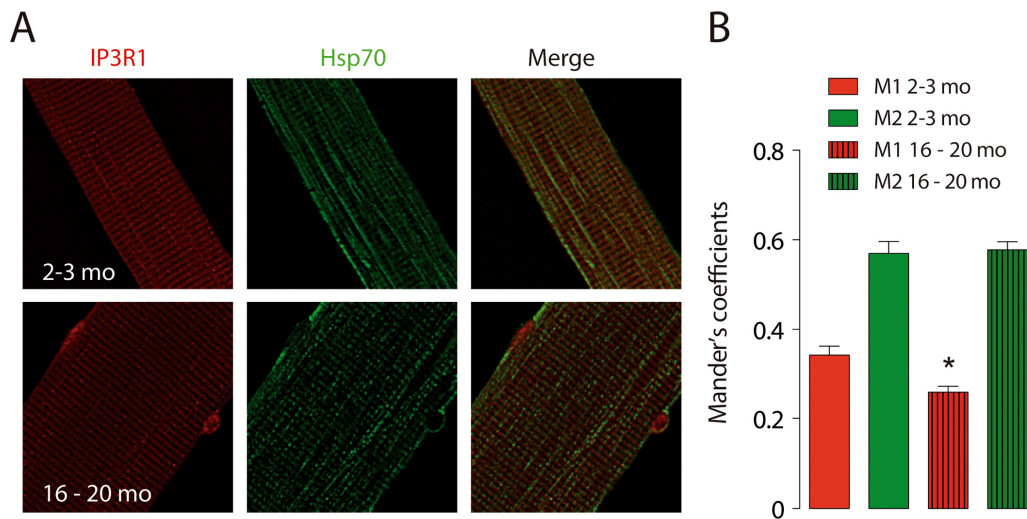

**Supplementary Figure 4. Co-localization of IP3R1 and Hsp70mt decreased in aged mice. (A)** Representative images of muscle fiber immunofluorescence towards IP3R1 (red), Hsp70mt (Green) and merge (right panel) of Juvenile (2-3 months) and Old (16-20 months) mice. **(B)** Mander's coefficient quantification decreased in old mice. (Fibers were fixed, permeabilized, blocked, and subsequently incubated with primary antibodies (anti-mtHsp70 or IP3R1). Images were taken by confocal microscopy in a Zeiss LSM-5, Pascal 5 Axiovert 200 microscope. For the co-localization analysis one focal plane was analyzed.
